# Supplementary material
Source: Springer Nature journal article supplement (https://www.springermedizin.de/resource/supplementary/12943_2012_1085_MOESM1_ESM.pdf/9552410)

**A.**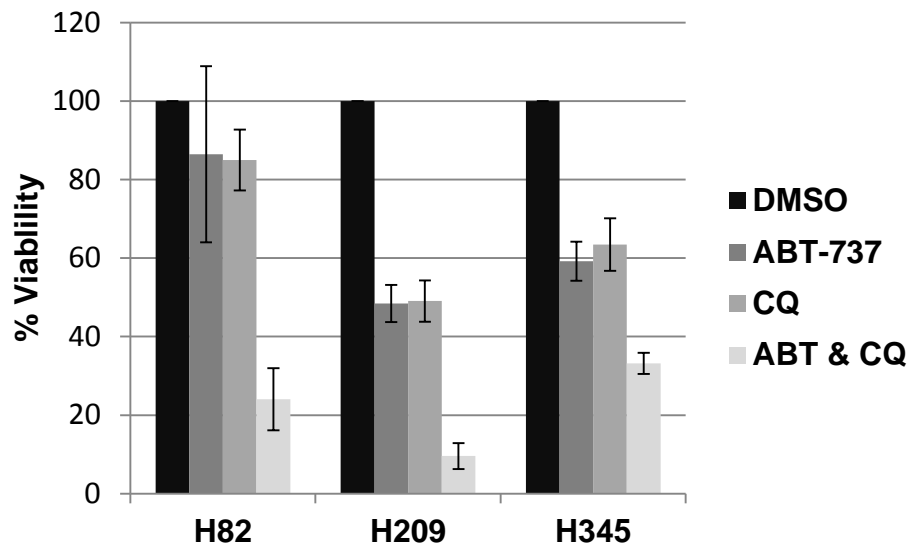**B.**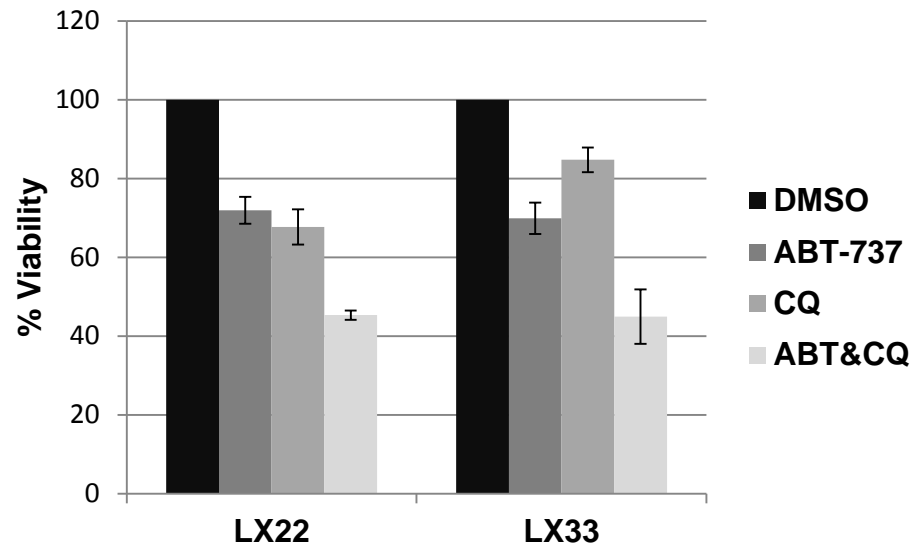**C.**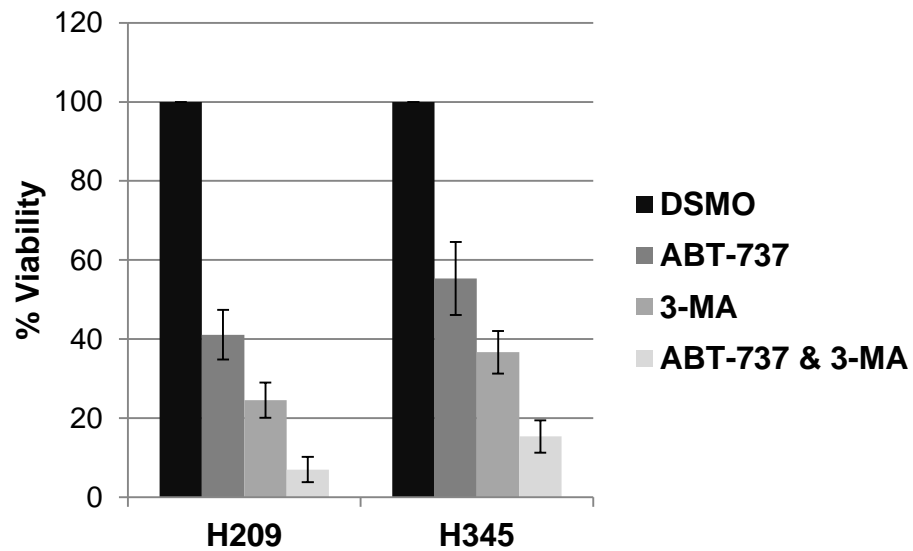

Supplement: MOESM1 [file 9552410]
